# Supplementary material for: Stochastic Model of Tsc1 Lesions in Mouse Brain
Source: PLoS One. 2013 May 16;8(5):e64224. doi: 10.1371/journal.pone.0064224 (PMC3655945; doi:10.1371/journal.pone.0064224)
Supplement: Table S1 — Histological analysis was carried out on Tsc1c/c mice following P0 ICV injection of AAV1-CBA-Cre or AAV1-CBA-GFP sacrificed at different time points. Severe hydrocephalus was seen in 2 of 10 AAV1-CBA-Cre injected brains, and mild hydrocephalus in 6 of 10 brains in animals sacrificed at 1–5 months of age due to signs of distress, including hunched back, dehydration and weight loss. In contrast, mild hydrocephalus was seen in only 1in 6 brains of animals injected with the AAV1-CBA-GFP control vector. (XLS) [file pone.0064224.s004.xls]

## Sheet: Sheet1
	Tsc1 Brain Model with AAV Vector
	Mouse genotype	age	virus	animal phenotype	brain phenotype	hydrocephalus	section
1	Tsc1c/c	P30	AAV-Cre	hunched back, dehydration, emaciation, swollen brain	normal # and staining level of pS6(+)	normal	coronal
2	Tsc1c/c	P30	AAV-Cre	hunched back, dehydration, emaciation, swollen brain	severe hydrocephalus, white matter degeneration, increased # of pS6(++) cells, big brain	severe	coronal
3	Tsc1c/c	P30	AAV-Cre	hunched back, dehydration, emaciation, swollen brain	severe hydrocephalus, white matter degeneration, increased # of pS6(++) cells, big brain	severe	coronal
4	Tsc1c/c	P60	AAV-Cre		mild hydrocephalus, enlarged cells with pS6(++) in cortex, enlarged brain	very mild/normal	sagittal
5	Tsc1c/c	P60	AAV-Cre		mild hydrocephalus, enlarged cells wihit pS6(++) in cortex, enlarged brain	mild, possible ectopic proliferation around ventricle	sagittal
6	Tsc1c/c	P60	AAV-Cre		mild hydrocephalus, enlarged cells with pS6(++) in frontal and posterior cortex, enlarged brain	mild	sagittal
7	Tsc1c/c	P90	AAV-Cre		enlarged cells with pS6(++) in cortex, enlarged brain	very mild/normal	sagittal
8	Tsc1c/c	P90	AAV-Cre		occasionally enlarged cells pS6(++) in cortex	normal	sagittal
9	Tsc1c/c	P120	AAV-Cre		mild hydrocephalus, enlarged cortical cells	very mild/normal	sagittal
10	Tsc1c/c	P120	AAV-Cre		mild hydrocephalus, enlarged cortical cells	mild	sagittal
11	Tsc1c/c	P150	AAV-Cre		enlarged cells in cortex and hip, vacuolated cells and gliosis in cortex	normal	sagittal
12	Tsc1c/c	P150	AAV-Cre		occasionally enlarged cells and vacuolated cells in cortex,	normal	sagittal
13	Tsc1c/c	P150	AAV-Cre		occationally enlarged cells in cortex and hip	normal	sagittal
14	Tsc1c/c AAV-GFP1	P30	AAV-GFP				coronal
15	Tsc1c/c AAV-GFP2	P30	AAV-GFP		hydrocephalus		coronal
16	Tsc1c/c AAV-GFP3	P30	AAV-GFP				sagittal
17	Tsc1c/c AAV-GFP4	P30	AAV-GFP				sagittal
18	Tsc1c/c AAV-GFP5	P30	AAV-GFP				sagittal
19	Tsc1c/c AAV-GFP6	P30	AAV-GFP				sagittal
20	Tsc1c/c	P23	AAV-Cre	hunched back, dehydration, emaciation, swollen brain	sick	normal	sagittal
21	Tsc1c/c	P23	AAV-Cre	hunched back, dehydration, emaciation, swollen brain	sick	normal	coronal
22	Tsc1c/c	P23	AAV-Cre	hunched back, dehydration, emaciation, swollen brain	sick	enlargement of ventricle	coronal
23	Tsc1c/c	P30	AAV-Cre	hunched back, dehydration, emaciation, swollen brain	a few large neurons in cerebral cortex	normal	sagittal
24	Tsc1c/c	P30	AAV-Cre	hunched back, dehydration, emaciation, swollen brain	a few large neurons in cerebral cortex	normal	sagittal
25	Tsc1c/c	P30	AAV-Cre		a few large neurons in cerebral cortex	normal	sagittal
26	Tsc1c/c	P30	AAV-Cre		a few large neurons in cerebral cortex	normal	sagittal
